# Supplementary material
Source: PubMed Central journal article supplement (PMC3003136)
Supplement: neo1212_1013SD1.pdf [file neo1212_1013SD1.pdf]

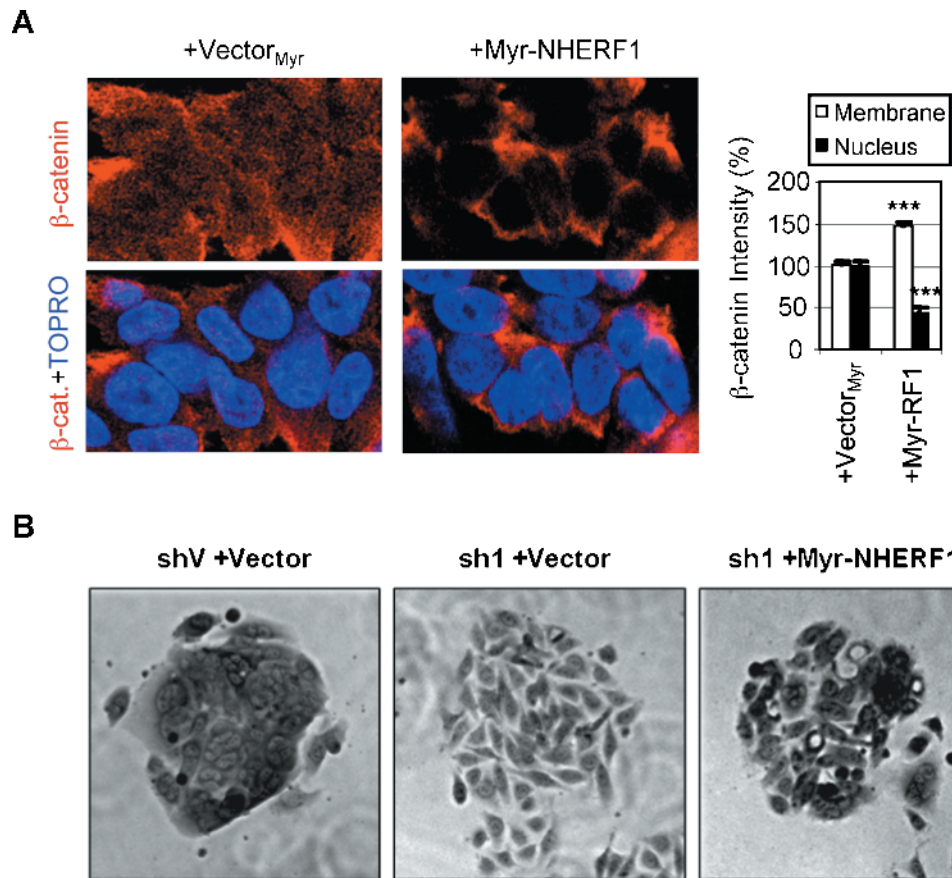

**Figure W1.** Membrane-targeted Myr-NHERF1 restores the epithelial morphology in NHERF1- depleted Caco-2 cells. (A) Confocal IF analysis shows redistribution of  $\beta$ -catenin from nucleus to the plasma membrane in NHERF1-depleted cells reconstituted with Myr-NHERF1. Densitometric analyses of  $\beta$ -catenin intensity are shown. Data are means  $\pm$  SEM.  $n = 25$ . \*\*\* $P < .001$  versus vector. (B) Crystal violet staining of Myr-NHERF1-reconstituted cells shows mesenchymal-to-epithelial transition-like morphological changes as compared to vector control cells.
